# Supplementary material for: Effect of Dietary Seaweed Supplementation in Cows on Milk Macrominerals, Trace Elements and Heavy Metal Concentrations
Source: MDPI journal article supplement (doi:10.3390/foods10071526), 2021-07-02
Supplement: s1 [file s1]

---

## Supplementary Material

**Table S1**

Ingredient composition (g/100g dry matter) of the concentrate feed fed during the animal trial.

|                        |       |
|------------------------|-------|
| Soybean                | 31.0  |
| Wheat                  | 21.0  |
| Corn                   | 15.1  |
| Barley                 | 10.45 |
| Sugar Beet Flour       | 8.0   |
| Molasses               | 6.0   |
| Shell Lime             | 2.5   |
| Hard Fat               | 2.0   |
| Mono-calcium Phosphate | 1.5   |
| Magnesium Phosphate    | 1.5   |
| Salt                   | 0.7   |
| Minerals/Vitamins      | 0.25  |

**Table S2**

Means, standard deviation (SD), minimum and maximum values for the average chemical composition (g/kg dry matter (DM)) of the three experimental diets (Control, no seaweed, CON; Low seaweed, 0.75% concentrate DM, LSW; High Seaweed, 1.5% concentrate DM, HSW) used in the animal trial

| Chemical composition (g/kg DM) | Control |     |      |      | Low-Seaweed |     |      |      | High-Seaweed |     |      |      |
|--------------------------------|---------|-----|------|------|-------------|-----|------|------|--------------|-----|------|------|
|                                | Mean    | SD  | Min  | Max  | Mean        | SD  | Min  | Max  | Mean         | SD  | Min  | Max  |
| Dry Matter (g/kg fresh)        | 62.9    | 0.4 | 62.4 | 63.4 | 61.8        | 0.4 | 61.3 | 62.3 | 63.4         | 0.4 | 62.9 | 63.9 |
| Ash                            | 8.0     | 0.3 | 7.6  | 8.4  | 7.9         | 0.3 | 7.5  | 8.3  | 8.1          | 0.3 | 7.6  | 8.5  |
| Crude Protein                  | 19.2    | 0.7 | 17.6 | 20.1 | 18.9        | 0.7 | 17.3 | 19.8 | 19.3         | 0.7 | 17.7 | 20.2 |
| Neutral Detergent Fiber        | 28.9    | 1.1 | 27.3 | 30.6 | 28.7        | 1.0 | 27.0 | 30.3 | 28.8         | 1.1 | 27.2 | 30.5 |
| Acid Detergent Fiber           | 44.6    | 3.1 | 40.4 | 50.4 | 43.9        | 3.1 | 39.8 | 49.6 | 44.9         | 3.2 | 40.7 | 50.8 |
| Fat                            | 4.1     | 0.3 | 3.7  | 4.5  | 4.0         | 0.3 | 3.7  | 4.4  | 4.1          | 0.3 | 3.7  | 4.4  |

**Table S3**

Means, standard deviation (SD), minimum and maximum values for the average mineral concentrations (mg/kg dry matter (DM)) of the three experimental diets (Control, no seaweed, CON; Low seaweed, 0.75% concentrate DM, LSW; High Seaweed, 1.5% concentrate DM, HSW) used in the animal trial

| Minerals (mg/kg DM) | Control |        |       |       | Low-Seaweed |        |       |       | High-Seaweed |        |       |       |
|---------------------|---------|--------|-------|-------|-------------|--------|-------|-------|--------------|--------|-------|-------|
|                     | Mean    | SD     | Min   | Max   | Mean        | SD     | Min   | Max   | Mean         | SD     | Min   | Max   |
| Aluminum (Al)       | 517     | 320.1  | 258   | 1365  | 521         | 324.2  | 245   | 1501  | 527          | 317.0  | 252   | 1477  |
| Arsenic (As)        | 0.41    | 0.202  | 0.22  | 0.92  | 0.47        | 0.200  | 0.23  | 0.97  | 0.64         | 0.169  | 0.32  | 1.00  |
| Cadmium (Cd)        | 0.05    | 0.010  | 0.03  | 0.07  | 0.05        | 0.011  | 0.03  | 0.07  | 0.05         | 0.010  | 0.03  | 0.07  |
| Calcium (Ca)        | 10206   | 820.5  | 8714  | 11755 | 10182       | 900.5  | 7787  | 11951 | 10371        | 896.1  | 8066  | 12565 |
| Chromium (Cr)       | 31      | 19.4   | 16    | 82    | 31          | 19.6   | 15    | 91    | 30           | 19.2   | 15    | 89    |
| Cobalt (Co)         | 2.20    | 0.446  | 1.54  | 3.08  | 2.18        | 0.467  | 1.30  | 3.12  | 2.21         | 0.457  | 1.34  | 3.13  |
| Copper (Cu)         | 42      | 6.4    | 31    | 58    | 42          | 6.9    | 28    | 58    | 42           | 6.8    | 28    | 59    |
| Iodine (I)          | 2.4     | 0.37   | 1.6   | 3.0   | 7.5         | 1.57   | 4.5   | 10.9  | 12.3         | 3.91   | 4.4   | 20.2  |
| Iron (Fe)           | 1147    | 618.7  | 709   | 2829  | 1153        | 625.8  | 707   | 3113  | 1152         | 613.1  | 711   | 3054  |
| Lead (Pb)           | 0.23    | 0.059  | 0.15  | 0.33  | 0.23        | 0.061  | 0.13  | 0.33  | 0.23         | 0.059  | 0.13  | 0.34  |
| Magnesium (Mg)      | 3152    | 1080.8 | 606   | 4147  | 3155        | 1067.3 | 570   | 4292  | 3199         | 1077.6 | 572   | 4367  |
| Manganese (Mn)      | 128     | 18.8   | 96    | 172   | 128         | 19.6   | 89    | 173   | 128          | 19.4   | 90    | 173   |
| Mercury (Hg)        | 0.005   | 0.0008 | 0.003 | 0.006 | 0.005       | 0.0008 | 0.003 | 0.006 | 0.005        | 0.0008 | 0.002 | 0.006 |
| Molybdenum (Mo)     | 1.44    | 0.274  | 1.07  | 1.93  | 1.43        | 0.283  | 0.94  | 1.97  | 1.44         | 0.277  | 0.97  | 1.99  |
| Nickel (Ni)         | 12      | 4.8    | 8     | 25    | 12          | 4.9    | 8     | 26    | 12           | 4.8    | 8     | 26    |
| Phosphorus (P)      | 5402    | 444.9  | 4572  | 6337  | 5373        | 455.6  | 4302  | 6510  | 5397         | 452.2  | 4265  | 6623  |
| Potassium (K)       | 15842   | 1106.2 | 13803 | 18517 | 16011       | 1187.8 | 13793 | 19788 | 16292        | 1200.0 | 13836 | 19897 |
| Selenium (Se)       | 0.58    | 0.071  | 0.44  | 0.71  | 0.58        | 0.077  | 0.39  | 0.73  | 0.58         | 0.076  | 0.40  | 0.74  |
| Sodium (Na)         | 2272    | 192.2  | 1833  | 2645  | 2308        | 213.1  | 1653  | 2797  | 2463         | 234.9  | 1814  | 3038  |
| Tin (Sn)            | 0.10    | 0.021  | 0.08  | 0.15  | 0.10        | 0.021  | 0.07  | 0.15  | 0.10         | 0.021  | 0.07  | 0.15  |
| Zinc (Zn)           | 100     | 15.7   | 75    | 140   | 99          | 16.6   | 69    | 141   | 100          | 16.5   | 70    | 141   |

**Table S4**

Means, standard error (SE) and ANOVA P-values for the effect of the dietary treatment (Control, no seaweed, CON; Low Seaweed, 0.75% concentrate DM, LSW; High Seaweed, 1.5% concentrate DM, HSW) on animal data, milk production and basic composition and efficiency parameters.

| Parameters                              | Week               |                    |                    |                     |                    |                    | ANOVA P-values |        |
|-----------------------------------------|--------------------|--------------------|--------------------|---------------------|--------------------|--------------------|----------------|--------|
|                                         | 1<br>n=37          | 2<br>n=37          | 3<br>n=37          | 4<br>n=37           | 5<br>n=37          | 6<br>n=37          | SE             | Week   |
| <b>Animal diet</b>                      |                    |                    |                    |                     |                    |                    |                |        |
| Estimated DMI <sup>2</sup> (kg/d)       | 14.4 <sup>ab</sup> | 14.5 <sup>a</sup>  | 14.4 <sup>b</sup>  | 14.3 <sup>b</sup>   | 14.4 <sup>b</sup>  | 14.3 <sup>b</sup>  | 0.05           | 0.041  |
| Forage:concentrate                      | 43.0 <sup>e</sup>  | 43.7 <sup>de</sup> | 44.6 <sup>cd</sup> | 45.2 <sup>bc</sup>  | 46.0 <sup>b</sup>  | 47.2 <sup>a</sup>  | 1.03           | <0.001 |
| Silage Intake (kg DM/d)                 | 6.17 <sup>e</sup>  | 6.27 <sup>de</sup> | 6.35 <sup>cd</sup> | 6.44 <sup>bc</sup>  | 6.57 <sup>b</sup>  | 6.72 <sup>a</sup>  | 0.146          | <0.001 |
| Concentrate Intake (kg DM/d)            | 8.25 <sup>a</sup>  | 8.18 <sup>a</sup>  | 8.02 <sup>b</sup>  | 7.90 <sup>bc</sup>  | 7.79 <sup>c</sup>  | 7.62 <sup>d</sup>  | 0.155          | <0.001 |
| Seaweed Intake (g DM/d)                 | 13.2 <sup>c</sup>  | 51.5 <sup>a</sup>  | 50.9 <sup>a</sup>  | 49.8 <sup>a</sup>   | 49.0 <sup>a</sup>  | 37.3 <sup>b</sup>  | 2.37           | <0.001 |
| <b>Milk production</b>                  |                    |                    |                    |                     |                    |                    |                |        |
| Yield (kg/d)                            | 25.9 <sup>ab</sup> | 26.2 <sup>a</sup>  | 25.5 <sup>b</sup>  | 25.2 <sup>b</sup>   | 25.4 <sup>b</sup>  | 25.2 <sup>b</sup>  | 0.40           | 0.041  |
| ECMY <sup>3</sup> (kg/d)                | 26.8 <sup>ab</sup> | 27.2 <sup>a</sup>  | 26.7 <sup>ab</sup> | 26.3 <sup>b</sup>   | 26.6 <sup>ab</sup> | 26.4 <sup>b</sup>  | 0.45           | 0.133  |
| <b>Milk composition</b>                 |                    |                    |                    |                     |                    |                    |                |        |
| Fat (g/100g)                            | 4.44               | 4.46               | 4.50               | 4.48                | 4.46               | 4.42               | 0.062          | 0.843  |
| Protein (g/100g)                        | 3.23 <sup>c</sup>  | 3.32 <sup>c</sup>  | 3.28 <sup>ab</sup> | 3.26 <sup>bc</sup>  | 3.28 <sup>ab</sup> | 3.31 <sup>a</sup>  | 0.019          | <0.001 |
| Casein (g/100g)                         | 2.34 <sup>c</sup>  | 2.37 <sup>bc</sup> | 2.39 <sup>b</sup>  | 2.35 <sup>c</sup>   | 2.38 <sup>b</sup>  | 2.45 <sup>a</sup>  | 0.017          | <0.001 |
| Lactose (g/100g)                        | 4.58 <sup>cd</sup> | 4.64 <sup>ab</sup> | 4.61 <sup>bc</sup> | 4.60 <sup>bcd</sup> | 4.57 <sup>d</sup>  | 4.66 <sup>a</sup>  | 0.020          | <0.001 |
| Whey Protein (g/100g)                   | 0.89 <sup>b</sup>  | 0.86 <sup>c</sup>  | 0.89 <sup>b</sup>  | 0.91 <sup>a</sup>   | 0.90 <sup>b</sup>  | 0.86 <sup>c</sup>  | 0.005          | <0.001 |
| Urea (mmol/L)                           | 5.90 <sup>d</sup>  | 5.52 <sup>e</sup>  | 6.58 <sup>b</sup>  | 6.80 <sup>a</sup>   | 6.13 <sup>c</sup>  | 6.22 <sup>c</sup>  | 0.093          | <0.001 |
| FFA <sup>4</sup> (mmol/L)               | 0.81 <sup>c</sup>  | 0.61 <sup>d</sup>  | 0.90 <sup>b</sup>  | 0.88 <sup>bc</sup>  | 0.93 <sup>b</sup>  | 1.04 <sup>a</sup>  | 0.031          | <0.001 |
| Fat:Protein                             | 1.37 <sup>a</sup>  | 1.38 <sup>a</sup>  | 1.37 <sup>ab</sup> | 1.38 <sup>a</sup>   | 1.36 <sup>ab</sup> | 1.33 <sup>b</sup>  | 0.020          | 0.198  |
| SCC <sup>5</sup> (x10 <sup>3</sup> /ml) | 144 <sup>b</sup>   | 221 <sup>ab</sup>  | 179 <sup>ab</sup>  | 272 <sup>a</sup>    | 168 <sup>ab</sup>  | 176 <sup>ab</sup>  | 49.8           | 0.255  |
| <b>Efficiency (g/kg DMI)</b>            |                    |                    |                    |                     |                    |                    |                |        |
| Milk Efficiency                         | 1779 <sup>ab</sup> | 1798 <sup>a</sup>  | 1758 <sup>bc</sup> | 1743 <sup>c</sup>   | 1756 <sup>bc</sup> | 1746 <sup>bc</sup> | 19.8           | 0.022  |
| Fat Efficiency                          | 78.6 <sup>ab</sup> | 79.7 <sup>a</sup>  | 78.8 <sup>ab</sup> | 77.8 <sup>ab</sup>  | 78.1 <sup>ab</sup> | 76.9 <sup>b</sup>  | 1.42           | 0.335  |
| Protein Efficiency                      | 57.1 <sup>ab</sup> | 57.8 <sup>a</sup>  | 57.4 <sup>ab</sup> | 56.5 <sup>b</sup>   | 57.4 <sup>ab</sup> | 57.5 <sup>ab</sup> | 0.58           | 0.244  |

<sup>1</sup> Significances were declared at  $P < 0.05$ . Means for diet treatment within a row with different letters are significantly different according to Fisher's Least Significant Difference test ( $P < 0.05$ )

<sup>2</sup> Dry Matter Intake

<sup>3</sup> Energy Correct Milk Yield = milk yield (kg)  $\times$  [0.01 + 0.0122 milk fat (g/kg) + 0.0077 milk protein (g/kg) + 0.053 milk lactose (g/kg)] [88]

<sup>4</sup> Free Fatty Acids

<sup>5</sup> Somatic Cell Count

**Table S5**

Means, standard error (SE) and ANOVA P-values for the effect of the dietary treatment (Control, no seaweed, CON; Low seaweed, 0.75% concentrate DM, LSW; High Seaweed, 1.5% concentrate DM, HSW) on milk mineral concentrations

| Minerals                                    | Week                |                     |                     |                     |                      |                      | ANOVA P-values |        |
|---------------------------------------------|---------------------|---------------------|---------------------|---------------------|----------------------|----------------------|----------------|--------|
|                                             | 1<br>n=37           | 2<br>n=37           | 3<br>n=37           | 4<br>n=37           | 5<br>n=37            | 6<br>n=37            | SE             | Week   |
| <b>Macrominerals (mg/kg)</b>                |                     |                     |                     |                     |                      |                      |                |        |
| Calcium (Ca)                                | 1127 <sup>ab</sup>  | 968 <sup>d</sup>    | 1150 <sup>a</sup>   | 1149 <sup>a</sup>   | 1073 <sup>bc</sup>   | 1049 <sup>c</sup>    | 26.5           | <0.001 |
| Magnesium (Mg)                              | 116.9 <sup>a</sup>  | 92.2 <sup>c</sup>   | 107.7 <sup>ab</sup> | 107.7 <sup>ab</sup> | 101.2 <sup>bc</sup>  | 99.4 <sup>bc</sup>   | 5.26           | 0.021  |
| Phosphorus (P)                              | 864.2 <sup>bc</sup> | 812.6 <sup>c</sup>  | 903.3 <sup>ab</sup> | 922.2 <sup>a</sup>  | 835.2 <sup>c</sup>   | 861.4 <sup>bc</sup>  | 22.45          | <0.001 |
| Potassium (K)                               | 1469 <sup>ab</sup>  | 1337 <sup>d</sup>   | 1512 <sup>a</sup>   | 1531 <sup>a</sup>   | 1418 <sup>bc</sup>   | 1387 <sup>cd</sup>   | 33.49          | <0.001 |
| Sodium (Na)                                 | 473.1 <sup>a</sup>  | 378.1 <sup>c</sup>  | 432.8 <sup>ab</sup> | 411.3 <sup>bc</sup> | 423.5 <sup>abc</sup> | 423.6 <sup>abc</sup> | 20.98          | 0.033  |
| <b>Essential trace elements (µg/kg)</b>     |                     |                     |                     |                     |                      |                      |                |        |
| Copper (Cu)                                 | 47.7 <sup>a</sup>   | 43.1 <sup>b</sup>   | 48.7 <sup>a</sup>   | 40.0 <sup>b</sup>   | 34.6 <sup>c</sup>    | 33.8 <sup>c</sup>    | 2.16           | <0.001 |
| Iron (Fe)                                   | 237.4 <sup>a</sup>  | 231.6 <sup>a</sup>  | 237.4 <sup>a</sup>  | 217.6 <sup>ab</sup> | 202.1 <sup>b</sup>   | 217.9 <sup>ab</sup>  | 9.37           | 0.02   |
| Iodine (I)                                  | 1254.9 <sup>c</sup> | 2383.6 <sup>b</sup> | 2514.1 <sup>a</sup> | 1251.3 <sup>c</sup> | 1333.2 <sup>c</sup>  | 978.2 <sup>d</sup>   | 52.51          | <0.001 |
| Manganese (Mn)                              | 26.1 <sup>b</sup>   | 27.3 <sup>ab</sup>  | 29.2 <sup>a</sup>   | 28.6 <sup>a</sup>   | 26.0 <sup>b</sup>    | 29.4 <sup>a</sup>    | 0.97           | 0.009  |
| Molybdenum (Mo)                             | 48.0 <sup>c</sup>   | 48.0 <sup>c</sup>   | 53.2 <sup>b</sup>   | 63.1 <sup>a</sup>   | 46.1 <sup>c</sup>    | 49.1 <sup>c</sup>    | 1.42           | <0.001 |
| Nickel (Ni)                                 | 1.06 <sup>b</sup>   | 1.12 <sup>b</sup>   | 1.32 <sup>b</sup>   | 4.60 <sup>a</sup>   | 2.05 <sup>b</sup>    | 0.81 <sup>b</sup>    | 0.546          | <0.001 |
| Selenium (Se)                               | 23.0 <sup>a</sup>   | 22.7 <sup>a</sup>   | 23.6 <sup>a</sup>   | 22.1 <sup>a</sup>   | 19.3 <sup>b</sup>    | 19.6 <sup>b</sup>    | 0.58           | <0.001 |
| Zinc (Zn)                                   | 4794 <sup>b</sup>   | 4609 <sup>bc</sup>  | 5233 <sup>a</sup>   | 4482 <sup>cd</sup>  | 4323 <sup>de</sup>   | 4175 <sup>e</sup>    | 109.5          | <0.001 |
| <b>Non-essential trace elements (µg/kg)</b> |                     |                     |                     |                     |                      |                      |                |        |
| Aluminum (Al)                               | 59.0 <sup>b</sup>   | 43.5 <sup>b</sup>   | 85.1 <sup>a</sup>   | 56.7 <sup>b</sup>   | 58.6 <sup>b</sup>    | 59.4 <sup>b</sup>    | 6.11           | <0.001 |
| Cobalt (Co)                                 | 0.56 <sup>a</sup>   | 0.43 <sup>bc</sup>  | 0.57 <sup>a</sup>   | 0.48 <sup>b</sup>   | 0.44 <sup>bc</sup>   | 0.39 <sup>c</sup>    | 0.024          | <0.001 |
| <b>Heavy metals (µg/kg)</b>                 |                     |                     |                     |                     |                      |                      |                |        |
| Arsenic (As)                                | 0.63 <sup>a</sup>   | 0.53 <sup>abc</sup> | 0.59 <sup>ab</sup>  | 0.52 <sup>bc</sup>  | 0.38 <sup>d</sup>    | 0.47 <sup>cd</sup>   | 0.041          | <0.001 |

<sup>1</sup> Significances were declared at  $P < 0.05$ . Means for diet treatment within a row with different letters are significantly different according to Fisher's Least Significant Difference test ( $P < 0.05$ )

**Table S6**

Means, standard error (SE) and ANOVA P-values for the effect of the dietary treatment (Control, no seaweed, CON; Low seaweed, 0.75% concentrate DM, LSW; High Seaweed, 1.5% concentrate DM, HSW) on transfer efficiency of minerals from feed to milk per week

| Minerals<br>(g in milk/100g ingested)       | Week               |                     |                    |                    |                     |                     | ANOVA P-values |        |
|---------------------------------------------|--------------------|---------------------|--------------------|--------------------|---------------------|---------------------|----------------|--------|
|                                             | 1<br>n=37          | 2<br>n=37           | 3<br>n=37          | 4<br>n=37          | 5<br>n=37           | 6<br>n=37           | SE             | Week   |
| <b>Macrominerals (mg/kg)</b>                |                    |                     |                    |                    |                     |                     |                |        |
| Calcium (Ca)                                | 19.2 <sup>bc</sup> | 16.8 <sup>e</sup>   | 20.1 <sup>ab</sup> | 20.4 <sup>a</sup>  | 18.2 <sup>cd</sup>  | 17.6 <sup>de</sup>  | 0.51           | <0.001 |
| Magnesium (Mg)                              | 6.13 <sup>b</sup>  | 4.57 <sup>c</sup>   | 5.02 <sup>bc</sup> | 23.18 <sup>a</sup> | 4.86 <sup>bc</sup>  | 4.72 <sup>bc</sup>  | 0.546          | <0.001 |
| Phosphorus (P)                              | 30.3 <sup>b</sup>  | 27.8 <sup>c</sup>   | 28.9 <sup>bc</sup> | 30.7 <sup>a</sup>  | 24.3 <sup>d</sup>   | 28.1 <sup>c</sup>   | 0.79           | <0.001 |
| Potassium (K)                               | 17.7 <sup>a</sup>  | 14.7 <sup>e</sup>   | 15.3 <sup>de</sup> | 16.7 <sup>b</sup>  | 15.6 <sup>cd</sup>  | 16.2 <sup>bc</sup>  | 0.48           | <0.001 |
| Sodium (Na)                                 | 36.1 <sup>a</sup>  | 28.1 <sup>c</sup>   | 30.4 <sup>bc</sup> | 33.3 <sup>ab</sup> | 31.5 <sup>abc</sup> | 31.6 <sup>abc</sup> | 1.84           | 0.031  |
| <b>Essential trace elements (µg/kg)</b>     |                    |                     |                    |                    |                     |                     |                |        |
| Copper (Cu)                                 | 0.17 <sup>b</sup>  | 0.18 <sup>b</sup>   | 0.23 <sup>a</sup>  | 0.18 <sup>b</sup>  | 0.14 <sup>c</sup>   | 0.16 <sup>b</sup>   | 0.010          | <0.001 |
| Iron (Fe)                                   | 0.04 <sup>c</sup>  | 0.05 <sup>b</sup>   | 0.05 <sup>b</sup>  | 0.05 <sup>b</sup>  | 0.01 <sup>d</sup>   | 0.05 <sup>a</sup>   | 0.002          | <0.001 |
| Iodine (I)                                  | 52.20 <sup>b</sup> | 54.19 <sup>ab</sup> | 55.65 <sup>a</sup> | 33.96 <sup>c</sup> | 34.91 <sup>c</sup>  | 36.79 <sup>c</sup>  | 1.34           | <0.001 |
| Manganese (Mn)                              | 0.03 <sup>d</sup>  | 0.04 <sup>c</sup>   | 0.04 <sup>b</sup>  | 0.04 <sup>b</sup>  | 0.03 <sup>d</sup>   | 0.05 <sup>a</sup>   | 0.001          | <0.001 |
| Molybdenum (Mo)                             | 5.06 <sup>e</sup>  | 6.15 <sup>d</sup>   | 7.92 <sup>b</sup>  | 8.99 <sup>a</sup>  | 4.31 <sup>f</sup>   | 6.83 <sup>c</sup>   | 0.207          | <0.001 |
| Nickel (Ni)                                 | 0.02 <sup>b</sup>  | 0.02 <sup>b</sup>   | 0.03 <sup>b</sup>  | 0.10 <sup>a</sup>  | 0.02 <sup>b</sup>   | 0.01 <sup>b</sup>   | 0.013          | <0.001 |
| Selenium (Se)                               | 6.50 <sup>b</sup>  | 6.63 <sup>b</sup>   | 7.38 <sup>a</sup>  | 6.88 <sup>b</sup>  | 5.55 <sup>c</sup>   | 6.83 <sup>b</sup>   | 0.203          | <0.001 |
| Zinc (Zn)                                   | 6.8 <sup>e</sup>   | 8.0 <sup>cd</sup>   | 10.3 <sup>a</sup>  | 8.5 <sup>bc</sup>  | 7.5 <sup>d</sup>    | 8.6 <sup>b</sup>    | 0.21           | <0.001 |
| <b>Non-essential trace elements (µg/kg)</b> |                    |                     |                    |                    |                     |                     |                |        |
| Aluminum (Al)                               | 0.02 <sup>c</sup>  | 0.02 <sup>c</sup>   | 0.05 <sup>a</sup>  | 0.03 <sup>b</sup>  | 0.01 <sup>d</sup>   | 0.04 <sup>b</sup>   | 0.002          | <0.001 |
| Cobalt (Co)                                 | 0.04 <sup>c</sup>  | 0.03 <sup>c</sup>   | 0.06 <sup>a</sup>  | 0.04 <sup>b</sup>  | 0.03 <sup>d</sup>   | 0.04 <sup>c</sup>   | 0.002          | <0.001 |
| <b>Heavy metals (µg/kg)</b>                 |                    |                     |                    |                    |                     |                     |                |        |
| Arsenic (As)                                | 0.13 <sup>c</sup>  | 0.15 <sup>c</sup>   | 0.29 <sup>a</sup>  | 0.25 <sup>b</sup>  | 0.15 <sup>c</sup>   | 0.24 <sup>b</sup>   | 0.017          | <0.001 |

<sup>1</sup> Significances were declared at  $P < 0.05$ . Means for diet treatment within a row with different letters are significantly different according to Fisher's Least Significant Difference test ( $P < 0.05$ )

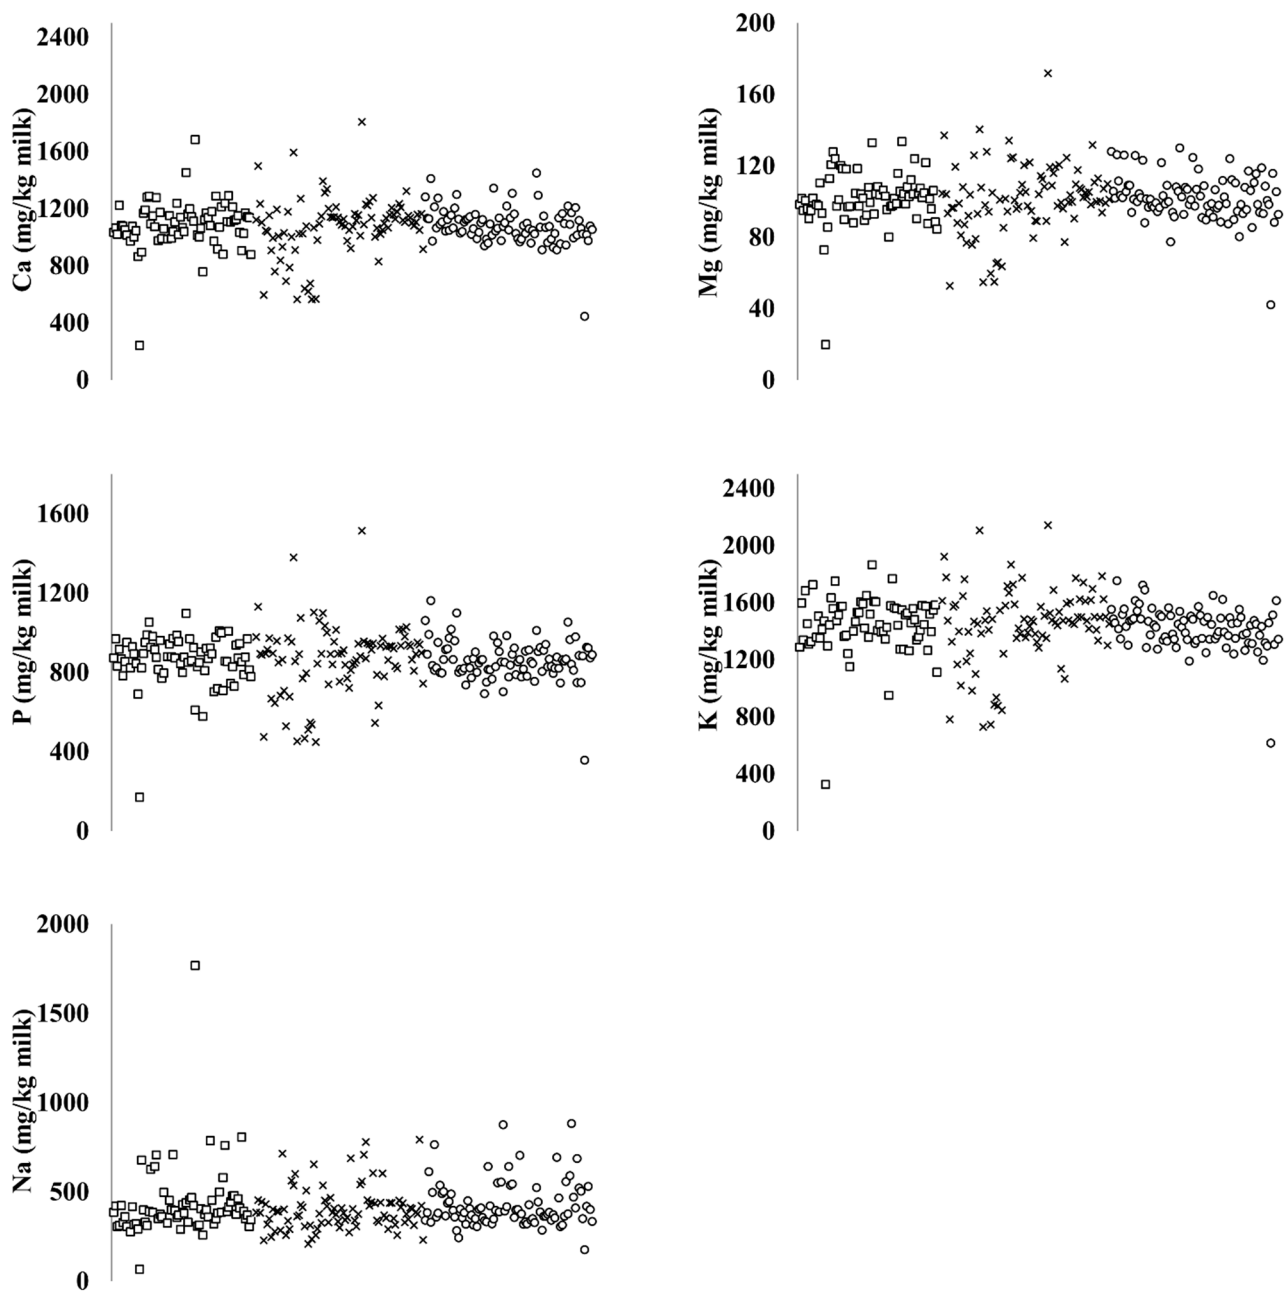**Figure S1**

Scatter plots of all measurements of macromineral concentrations in milk samples collected throughout the study from the three experimental groups ( $\square$ , control, no seaweed;  $\times$ , Low seaweed, 0.75% concentrate DM;  $\circ$ , High Seaweed, 1.5% concentrate DM).

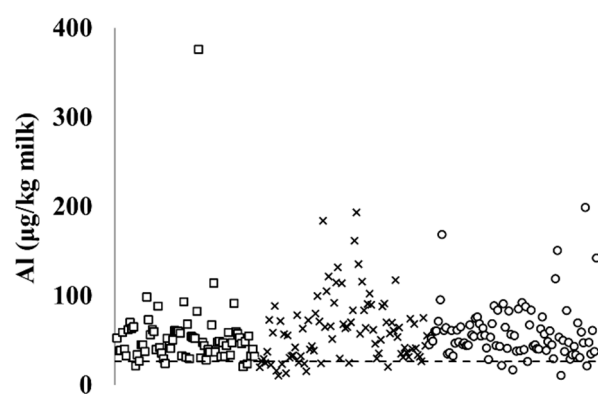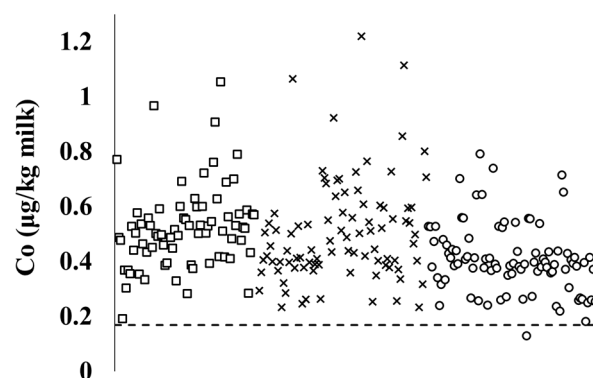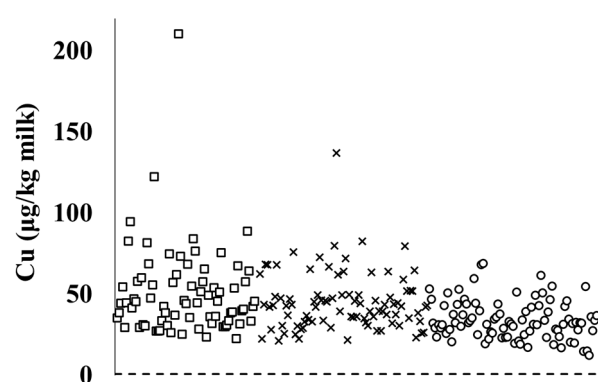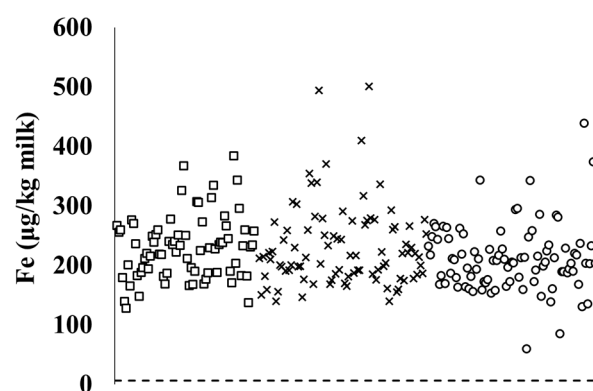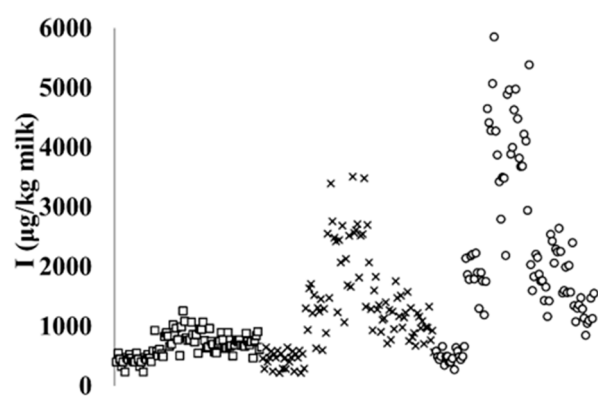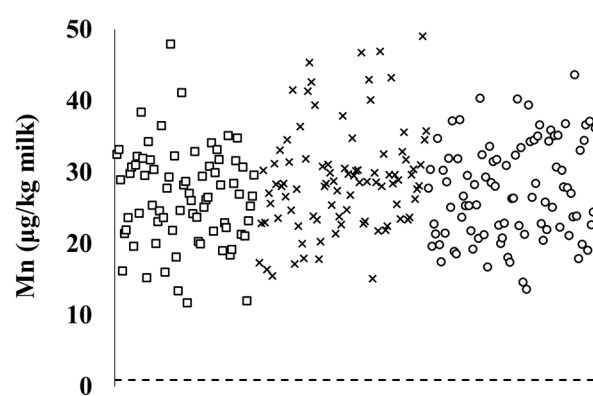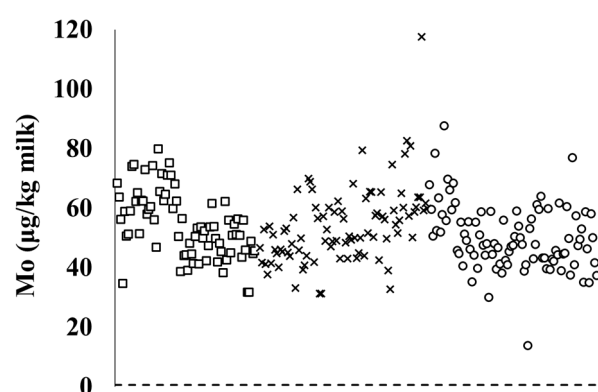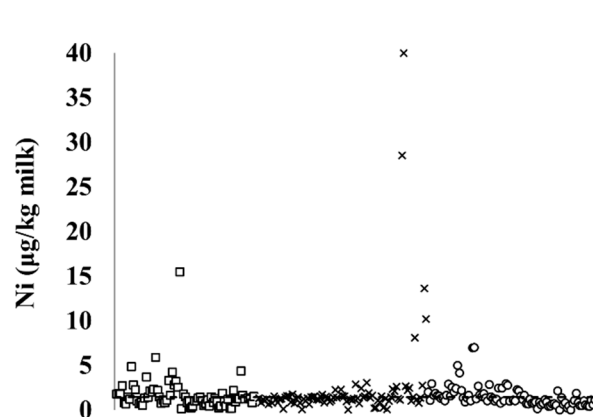



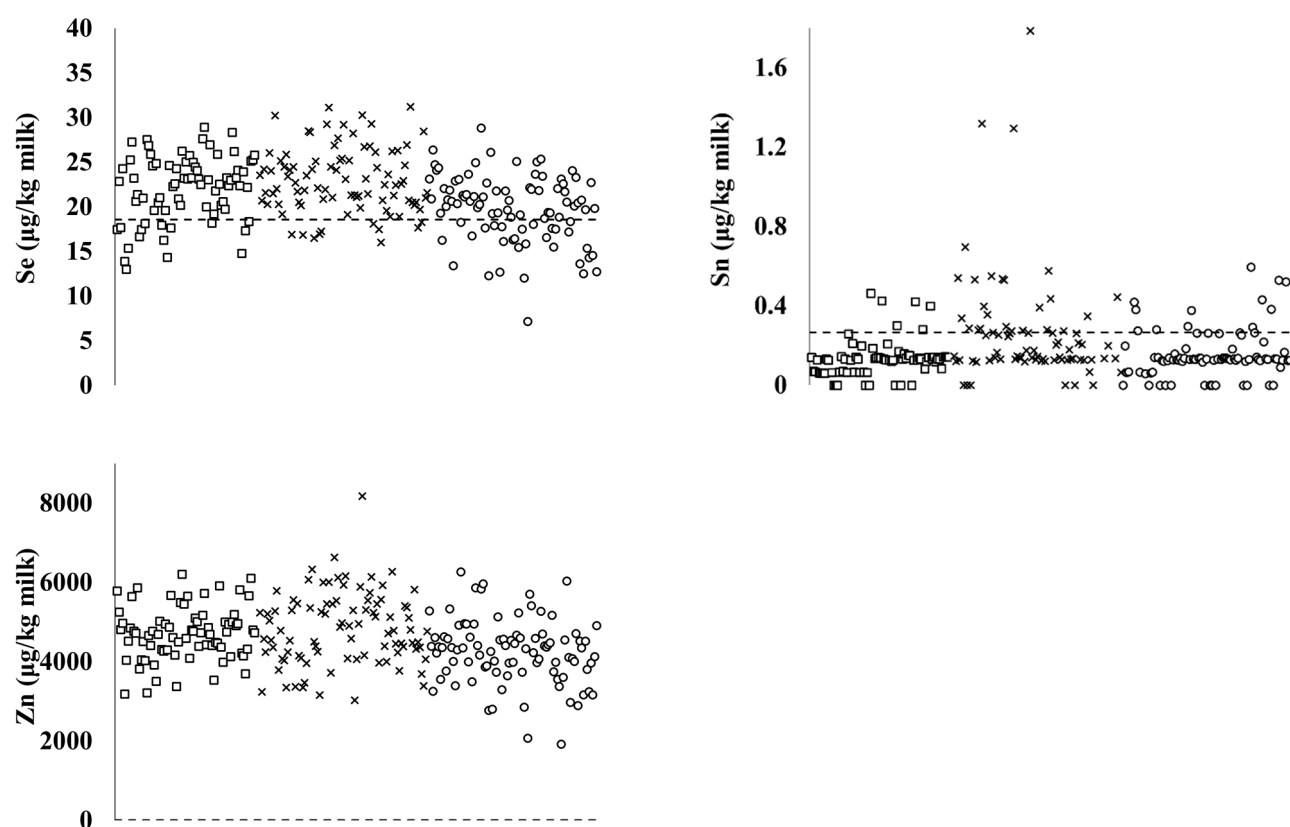

**Figure S2**

Scatter plots of all measurements of trace element concentrations in milk samples collected throughout the study from the three experimental groups ( $\square$ , control, no seaweed;  $\times$ , Low seaweed, 0.75% concentrate DM;  $\circ$ , High Seaweed, 1.5% concentrate DM). The horizontal dotted lines represent limits of quantification for each element. The limits of quantification of trace elements are: Co, 0.169  $\mu\text{g/kg}$  milk; Cu, 0.911  $\mu\text{g/kg}$  milk; Fe, 6.417  $\mu\text{g/kg}$  milk; Mn, 0.936  $\mu\text{g/kg}$  milk; Mo, 0.625  $\mu\text{g/kg}$  milk; Se, 18.599  $\mu\text{g/kg}$  milk; Zn, 9.974  $\mu\text{g/kg}$  milk; Al, 26.570  $\mu\text{g/kg}$  milk; Ni, 1.457  $\mu\text{g/kg}$  milk; Sn, 0.266  $\mu\text{g/kg}$  milk. The proportions of individual measurements which were below LOQs were: Co, 1%; Cu, 0%; Fe, 0%; Mn, 0%; Mo, 0%; Se, 22%; Zn, 0%; Al, 9%; Ni, 53%; Sn, 88%.

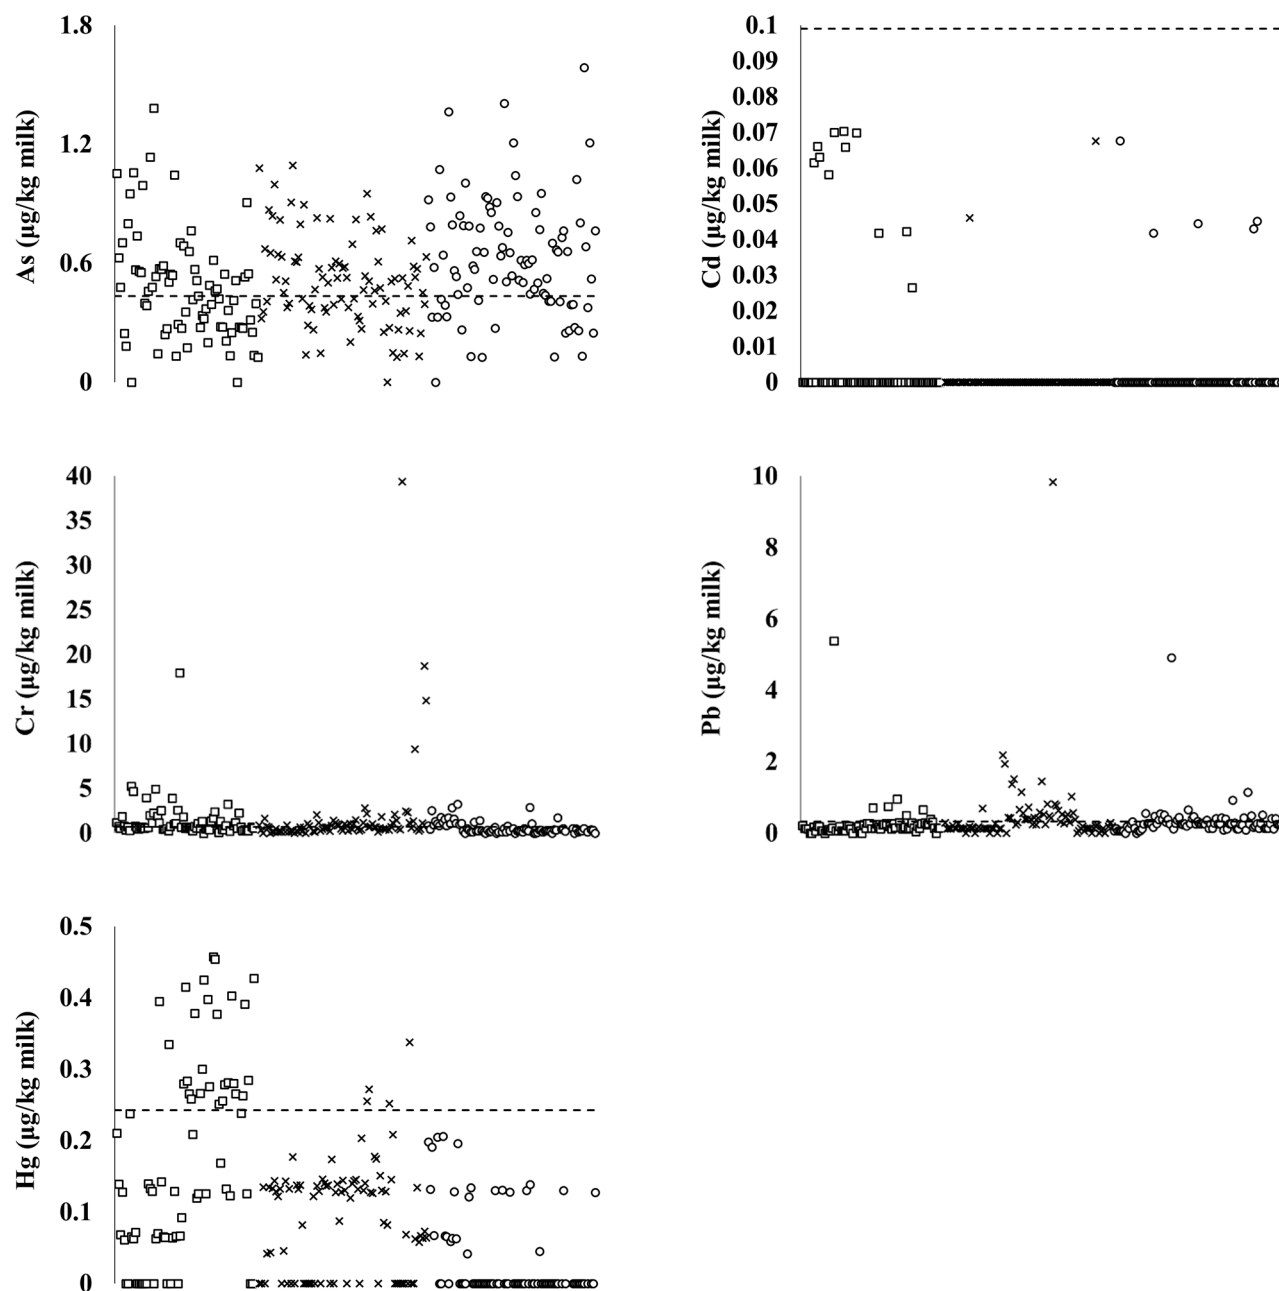

**Figure S3**

Scatter plots of all measurements of heavy metal concentrations in milk samples collected throughout the study from the three experimental groups (□, control, no seaweed; ×, Low seaweed, 0.75% concentrate DM; ○, High Seaweed, 1.5% concentrate DM). The horizontal dotted lines represent limits of quantification for each element. The limits of quantification of heavy metals are: As, 0.435 μg/kg milk; Cd, 0.099 μg/kg milk; Cr, 0.696 μg/kg milk; Hg, 0.243 μg/kg milk; Pb, 0.335 μg/kg milk. The proportions of individual measurements which were below LOQs were: As, 28%; Cd, 96%; Cr, 59%; Hg, 92%; Pb 82%.
